1 **Influenza A(H1N1)pdm09 M and HA segments sequences from Rio**  
2 **Grande do Sul, Brazil**

3 Matias,F.<sup>\*†</sup>, Kretzmann,N.A.<sup>\*</sup>, Bisognin,C.Z.<sup>\*</sup>, Teixeira,K.P.<sup>\*</sup>, Corrêa,L.T.<sup>\*</sup>, Vieira,P.I.  
4 <sup>†</sup>, Ikuta,N.<sup>‡</sup>, Gregianini,T.S.<sup>§</sup>, da Veiga,A.B.G.<sup>\*</sup> and d'Azevedo,P.A.<sup>\*</sup>

5 <sup>\*</sup> - Universidade Federal de Ciências da Saúde de Porto Alegre (UFCSPA), Graduate  
6 Program in Pathology, Laboratory of Molecular Microbiology and Laboratory of  
7 Molecular Biology, Porto Alegre, RS, Brazil

8 <sup>†</sup> - Universidade Federal Rural do Semi-Árido, Biological Sciences Department,  
9 Laboratory of Bioreactors, Nanobiotechnology and Innovation, Mossoró, RN, Brazil.

10 <sup>‡</sup> - Universidade Luterana do Brasil, Pró Reitoria de Pesquisa e Pós-Graduação,  
11 Laboratory of Molecular Diagnose (ULBRA), Canoas, RS, Brazil.

12 <sup>§</sup> - Laboratório Central/Fundação Estadual de Produção e Pesquisa em Saúde-Rio  
13 Grande do Sul (IPB-LACEN/FEPPS-RS), Laboratory of Virology, Porto Alegre, RS,  
14 Brazil

15

16 Numbers of the deposited sequences: KU143688–KU143706 (M segment);  
17 MG784976–MG784982; MG785397–MG785406 (HA segment).

18

1 **Influenza A(H1N1)pdm09 M and HA segments sequences from Rio**  
2 **Grande do Sul, Brazil**

3

4 Key words: Pandemic influenza A (H1N1), Brazil, HA segment, M segment, Rio  
5 Grande do Sul

6

7 Corresponding Author: Ana Beatriz Gorini da Veiga - [anabgv@ufcspa.edu.br](mailto:anabgv@ufcspa.edu.br),  
8 Universidade Federal de Ciências da Saúde de Porto Alegre (UFCSPA), R. Sarmento  
9 Leite, 245 / sala 309-Centro, CEP 90.050-170, Porto Alegre, RS, Brazil. Phone: +55 51  
10 3303-8763

11 Fernanda Matias - [fernandamatias@ufersa.edu.br](mailto:fernandamatias@ufersa.edu.br), Universidade Federal Rural do  
12 Semi-Árido, Rua Francisco Mota, 572, Departamento de Biociências, sala 25, Costa e  
13 Silva, CEP 59.625-900, Mossoró, RN, Brazil

14

15 Abstract

16 The influenza virus is one of the most critical viruses in epidemiology. The 2009  
17 pandemic was caused by a reassortment of the human–avian–swine virus with eight  
18 RNA segments responsible for all virus proteins. Segment 7 codifies for matrix proteins  
19 M1 and M2. These proteins exhibited low mutation rate because the matrix is  
20 fundamental for virion encapsidation and ion channel formation. However,  
21 hemagglutinin (HA) segment 4 is one of the most important segments for virulence and  
22 hence, is more studied. Brazil had many influenza virus infection cases just before 2009  
23 and from 2011 to 2015, particularly in the Rio Grande do Sul (RS) State. Two hundred  
24 samples obtained during the pandemic were used for amplification and sequencing of  
25 the viral genome; a total of 19 M and 17 HA amplified segments were sequenced.  
26 Sequencing of the M fragment showed that RS has a virus origin different from that in  
27 Eastern Asia, Western Europe, USA, and Central America (Mexico and Nicaragua). All  
28 the sequences showed amantadine resistance (S31N) and one was out of the  
29 phylogenetic tree (Brazil/RS-3335/2009) due to high mutation rate. RS-3335 was the  
30 only sample obtained from a patient who died. Many migratory birds that flock to RS  
31 are from Europe, Asia, and USA, which could explain this rate of mutation. Insertions  
32 and deletions were found in the M1 protein in these samples. The HA sequences  
33 showed worldwide spread and less diversity than the M sequences in this study. The

- 1 most divergent sample was Brazil/RS-3093/2009 that showed mutations in the sialic
- 2 acid ligation site.
- 3

## 1 Introduction

2 The influenza virus is an enveloped RNA virus surrounded by a lipid bilayer that  
3 belongs to the *Orthomyxoviridae* family. This virus is responsible for the most  
4 significant pandemics worldwide and is first classified into A, B, or C types, with the  
5 last two being less common. Influenza A is divided according to antibody response to  
6 the combination between hemagglutinin (HA) and neuraminidase (NA) proteins, called  
7 “H” and “N” for this classification, respectively. There are at least 16 serotypes of H  
8 and nine serotypes of N, enabling 144 combinations. The segments H1, H2, and H3  
9 combined with N1 and N2 serotypes are more common in humans (Lynch and Walsh  
10 2007). In 2013, a new influenza A virus (H7N9) was described (WHO 2013). Among  
11 these serotypes, H1N1 was responsible for the 1918 (Spanish flu; Mills *et al.* 2004) and  
12 2009 (swine flu; Schnitzler and Schnitzler 2009) pandemics.

13 The 2009 pandemic H1N1 (pH1N1) virus was first described in March in the cities of  
14 Sao Luís do Potosi and Oaxaca, Mexico. On April 17, 2009, it reached the United States  
15 of America, thus, spreading quickly worldwide, resulting in approximately 9 000 deaths  
16 by November of that year (Smith *et al.* 2009). In Brazil, the first case was reported on  
17 April 24 in Sao Paulo. Almost at the same time, one more case was reported in Sao  
18 Paulo, one case in Rio de Janeiro, and one in Minas Gerais—all southeastern states—  
19 with three patients coming from Mexico and one from USA. The first incident of death  
20 occurred in RS, the southernmost state of the country, on July 26. The patient was a  
21 truck driver who was in Argentina for seven days. RS had the highest number of cases  
22 and deaths, particularly during autumn and winter periods.

23 H1N1 is a virus consisting of eight RNA segments encoding eleven genes and proteins,  
24 viz., RNA polymerase basic proteins (PB1, segment 1; PB1-F2; and PB2, segment 2),  
25 RNA polymerase (PA; segment 3), hemagglutinin (HA; segment 4), nucleocapsid  
26 protein (NP; segment 5), neuraminidase (NA; segment 6), matrix proteins (M1 and M2;  
27 segment 7), and nonstructural proteins (NS1 and NS2; segment 8) (Ghedini 2005). HA  
28 and NA are the most studied proteins in influenza resistance and virulence, as these proteins  
29 are involved in the host immune response and are more likely to mutate. Matrix protein  
30 (MP) is divided into two proteins: M1, which is inside the envelope and interacts with the  
31 genome, synthesizing new viral fragments; and M2, which synthesizes ionic channels that  
32 facilitate the interaction between the inner and outer environments of the virus, primarily  
33 when it is producing HA and during viral desencapsidation. Unlike HA and NA, MP  
34 typically remains conserved, as the matrix is an essential part of the virus.

1 One copy of each segment is packaged during viral assembly in one virion particle. The  
2 PB2, PA, NP, and M segments are the most critical segments in virus packaging (Gao *et al.*  
3 2012). According to Gao *et al.*, (2012), Amorim *et al.* (2011), and Marsh *et al.* (2008), PB1,  
4 HA, NA, and NS play non-essential roles during genome assembly and may be more  
5 permissive toward reassortment than PB2, PA, NP, and M. The matrix segment has been  
6 studied more since these discoveries were made. This study aimed to obtain more data on  
7 the 2009 pandemic in the state of RS, Brazil, through M and HA sequence analysis and  
8 analysis of the relationship between the symptoms. Brazilian epidemiological data were  
9 also used to understand some of our results.

10

11 Materials and Methods

12 Samples and sequencing

13 Nasopharyngeal aspirate samples were collected from RS, Brazil, during the 2009  
14 outbreak (Veiga *et al.* 2012). Ethics approval was provided by the Research Ethics  
15 Committee of Universidade Federal de Ciências da Saúde de Porto Alegre (UFCSPA).  
16 Identification of pH1N1 was conducted at the Central Laboratory of the State (LACEN)  
17 by real-time PCR (Veiga *et al.* 2012). RNA extractions were performed at Universidade  
18 Luterana do Brasil (ULBRA), using NewGene Extraction Kit (Simbios Biotecnologia,  
19 RS, Brazil), and handled at Universidade Federal de Ciências da Saúde de Porto Alegre  
20 (UFCSPA). cDNA library was constructed using SuperScript III Reverse Transcriptase  
21 according to the manufacturer's instructions (Life Technologies). The samples were  
22 stored at  $-80^{\circ}\text{C}$ .

23 Many approaches were used to amplify the HA and M segments, as mentioned in Table  
24 1. Conventional PCR was conducted using KAPA 2G Robust HotStart ReadyMix  
25 (Biosystems, Boston, USA). The amplicons were treated with Shrimp Alkaline  
26 Phosphatase and Exonuclease I, marked with Big Dye Terminator v3.1 kit Cycle  
27 Sequencing Kit (Life Technologies), and sequenced using ABI 3130 (Life  
28 Technologies). The sequences were constructed and analyzed using Staden 2.0 for  
29 Windows and Pregap4 software (Staden 1996). First, all the H1N1 sequences were  
30 collected from the Influenza Research Database (IRD) (<http://www.fludb.org/>), aligned  
31 using the online software MAFFT and the FF-NS-2 strategy  
32 (<http://mafft.cbrc.jp/alignment/server/>), and a rough tree was constructed. Sequences  
33 with maximum similarity were selected for a new alignment. Next, the resulting  
34 sequences from this alignment were compared using BLAST (Basic Local Alignment

1 Tool). All matches obtained in this search were used for a new alignment, using the  
2 MEGA 7 software (Tamura et al., 2016) and MUSCLE.

3 Phylogenetic analysis and map construction

4 The phylogenetic tree was constructed using the MEGA 7 software (Tamura *et al.*  
5 2016) by the neighbor-joining (NJ) method (Saitou and Nei 1987) with the statistical  
6 method of maximum likelihood (ML) (Tamura *et al.* 2004). The trees were exported as  
7 Newick trees to the iTOL online software (Letunic and Bork 2011) to select subtrees to  
8 be used for new alignments. The shared phylogenetic trees can be found at the iTOL  
9 page, under the login ID fernandamatias. To construct an interactive map, all sequences  
10 were distributed in Excel according to their similarity and clade. This approach  
11 provided a better view of the sequences analyzed in this study. Information on GenBank  
12 accession number, host, strain, influenza type, and the location of samples were added  
13 to construct a more concise and complete map. The subtrees selected were used to  
14 create a map of RS samples and other worldwide more similar samples. The interactive  
15 map was constructed using the online platform Google My Maps  
16 (<https://www.google.com/mymaps/>).

17

18 Epidemiological Influenza information

19 During the 2009 influenza pandemic, 218 pandemic influenza samples from RS (Veiga  
20 *et al.* 2011) were analyzed for acute respiratory infection (ARI) symptoms (fever,  
21 cough, chills, dyspnea, sore throat, arthralgia, myalgia, conjunctivitis, rhinorrhea, and  
22 diarrhea) and comorbidities (cardiopathy, pneumonia, renal complications,  
23 immunodepression, and chronic metabolic disease) using Fisher's exact test to evaluate  
24 the relationships between the symptoms.  $p < 0.05$  was considered to indicate  
25 statistically significant differences. The Gephi 0.9.1 software (Bastian *et al.* 2009) was  
26 used to analyze the most frequent and most related symptoms. Another approach was to  
27 analyze Brazilian online bulletins of influenza provided by the Brazilian Health  
28 Ministry (Brasil 2012a; Brasil 2012b; Brasil 2013; Brasil 2014; Brasil 2015) to  
29 understand the epidemiology of influenza in Brazil from 2009 to 2015. These bulletins  
30 were used to distinguish the number of cases and deaths from 2009 to 2015 in different  
31 regions of the country (Table 2).

32

33 Results

34 Genetic analysis

1 Several primers were tested for partial amplification of the M and HA segments, as  
2 shown in Table 1. First positive results for the M segments were obtained using MF1  
3 and MR1 primers yielding a 700-bp fragment, but from all samples, only three segments  
4 were amplified. The second approach using MF2 and MR2 provided only seven  
5 amplifications of a 627-bp fragment, which was still not a good yield. Phylogenetic  
6 analysis of these amplifications showed a highlighted clade compared to that in samples  
7 available on genomics databases. Thus, it was necessary to obtain a new amplicon  
8 covering the largest possible area of the segment, as the highlighted clade could be an  
9 artifact of the amplified region with a small sample size. In this way, the third approach  
10 was designed to achieve complete M segment amplification. Of all the primers  
11 suggested by the John Craig Venter Institute (JCVI), 10 were synthesized and combined  
12 to yield nine pairs that were tested (Table 3). The combinations and number of  
13 amplified samples are summarized in Table 3. From all the M sequences obtained, only  
14 19 sequences overlapped and were used to create a contiguous consensus sequence. For  
15 the HA sequence, the first approach resulted in five positives using HAF1 and HAR1,  
16 but the second approach using HAF2 and HAR2 yielded 17 amplicons of approximately  
17 700 bp. Primers from JCVI were used as well but showed no positive amplification in  
18 these samples.

19 The M sequences obtained from the RS samples received GenBank accession numbers  
20 KU143688–KU143706 and were compared to all sequences available in the genetic  
21 databases until October 2014. First, the RS sequences were aligned to the H1N1  
22 sequences, human or not, and opened in IRD, irrespective of the year. Sequences that  
23 were more similar to the sequences obtained in this study were chosen and retrieved.  
24 Next, the RS sequences were analyzed one by one by BLAST to search for more similar  
25 sequences available in this database. With these two approaches, 466 sequences were  
26 obtained and compared to the RS sequences. All Brazilian sequences were included.  
27 The phylogenetic tree showed few branches (red circles) with the RS sequences  
28 (highlighted in yellow) (Figure 1). Two RS sequences were outgrouped in this analysis:  
29 Brazil/RS-3335/2009 and Brazil/RS-3504/2009. Seventy-four sequences, including 19  
30 RS sequences, were selected for a new alignment and for generation of a new  
31 phylogenetic tree (Figure 2). The only significant difference in all sequences was  
32 obtained in sample Brazil/RS-3335/2009, which resulted in the death of the patient. For  
33 samples from Brazil, only one similarity was observed to three other RS sequences and  
34 one sequence from Sao Paulo, but only two of these sequences were related to the M

1 sequences of this study. This phylogenetic tree was used to generate the interactive map  
2 to assess the most similar sequences associated with the result of this study  
3 (<https://www.google.com/maps/d/edit?mid=zQfm5yljIn54.k7PW6v6h1pJI&usp=sharing>  
4 [g](#)). This map showed the position of the RS samples, almost all from the northeast of the  
5 state, with some being near Argentina (Figure 3). From all 60 Brazilian sequences, only  
6 two swine sequences (Figure 3; black square), Brazil/G2P2/2013 and  
7 Brazil/G2P1/2013, both H1N2, from RS were directly related to Brazil/RS-3538/2009  
8 and Brazil/RS-3093/2009 sequences. Another significant result obtained was the global  
9 position of most similar sequences linked to the sequences of this study, which were  
10 from USA, Mexico, Western Europe, and Eastern Asia (Figure 4). Interactive map  
11 shows that there were no RS sequences against similar sequences from group 14. The  
12 most significant changes in amino acid composition were in M1 protein (Table 4). For  
13 the construction of M1 protein table, Brazil/RS-3335/2009 and Brazil/RS-3504/2009  
14 sequences were excluded as they were vastly different from California/04/2009 and  
15 were more similar to Guangdong/55/2009. This approach was not necessary when  
16 comparing the M2 protein. The M1 protein showed insertions, deletions, and  
17 substitutions. Brazil/RS-1892/2009 and Brazil/RS-2009/2009 showed many similarities,  
18 including substitutions at G73A, E197T, and Q198T and insertion of R at position  
19 74/75, K at position 197/198, and S at position 200/201. Brazil/RS-2656/2009 showed  
20 substitutions at A96T, S196R, and Q198T; deletion of E at position 197; and insertion  
21 of S at position 200/201. Brazil/RS-2905/2009 showed only one substitution, N91Q.  
22 Brazil/RS-3538/2009 showed two substitutions at the beginning of the protein, K47T  
23 and P54Y. M2 revealed more similarities than M1. All RS M sequences contained the  
24 signature mutation S31N in M2 that may have conferred amantadine resistance.  
25 Brazil/RS-3435/2009 showed the highest number of substitutions, viz., Q77N, D85G,  
26 V86C, and F91L. Brazil/RS-2014/2009, Brazil/RS-2656/2009, and Brazil/RS-  
27 3335/2009 showed one amino acid substitution each, E95K, R54L, and I94K,  
28 respectively.

29 Seventeen HA sequences obtained from RS samples are available under the GenBank  
30 accession numbers MG784976–MG784982 and MG785397–MG785406. These  
31 sequences were compared to all sequences available on IRD until July 2016,  
32 disregarding the year of influenza virus sequence or the host. The sequences most  
33 identical to those obtained in this study were chosen and retrieved to yield a total of 796



1 sequences. All similarities obtained were for 2009, 2010, and 2011 sequences, and only  
2 three were swine-like sequences. Three phylogenetic trees were constructed until  
3 obtaining the most similar sequences to yield a total of 258 sequences. The third  
4 phylogenetic tree showed only four groups (Figure 5) and was used to construct the  
5 interactive map ([https://www.google.com/maps/d/u/0/edit?hl=pt-  
6 BR&mid=1zn3GhGcRZHYGyct\\_jIsERPA0ZDQ5Nj4&ll=5.411776974245612%2C0  
7 &z=2](https://www.google.com/maps/d/u/0/edit?hl=pt-BR&mid=1zn3GhGcRZHYGyct_jIsERPA0ZDQ5Nj4&ll=5.411776974245612%2C0&z=2)). The map obtained (Figure 6) showed the worldwide spread (Figure 6A) of HA  
8 segment compared to HA sequences of this study and high similarity to other Brazilian  
9 (Figure 6B) HA. Distribution of the samples was primarily from the middle to the east  
10 of RS (Figure 6C). Only amino acid substitutions were observed in these sequences  
11 when compared to California/04/2009 (Table 5), Brazil/RS-3900/2009 Q32E,  
12 Brazil/RS-3466/2009 A38E, Brazil/RS-5377/2009 D65E, Brazil/RS-2529/2009 G105E,  
13 Brazil/RS-5081/2009 T113K, Brazil/RS-2014/2009, Brazil/RS-2584/2009, and  
14 Brazil/RS-3869/2009 Q136H. Brazil/RS-3093/2009 had the most different sequence  
15 with N137D, I138M, H139Q, and I141T substitutions. Almost all sequences harbored  
16 the substitution I164V, except for Brazil/RS-5377, which harbored a substitution at  
17 I167V. The only patient death occurred with Brazil/RS-3222/2009 harboring only one  
18 substitution (I164V).

19

## 20 Epidemiology analysis

21 Although pH1N1 presents no danger to the world, in Brazil, this virus is still monitored  
22 by Health Ministry as it exists between circulating viruses and has resulted in higher  
23 mortality rates over the years. In 2014, there was an increase in the number of cases of  
24 H3N2, overcoming cases of pH1N1 in all regions of Brazil. However, in percentage, the  
25 number of deaths was lower than that caused by pH1N1. The virus influenza A H3N2  
26 presented a proportion of deaths of approximately 9% in 2013 and 2014, whereas  
27 influenza A pH1N1 virus presented a mortality rate of 20.6% in 2013 and 35% in 2014  
28 (Table 6). The number of cases in southeast and south of Brazil, highlighting the states  
29 of South and São Paulo, from 2009 to 2015 are shown in Table 6. It has been observed  
30 that Paraná has the highest number of cases in the south, which pertained in 2010. In  
31 2010, RS reported no evidence of pH1N1. However, in 2011, RS presented cases of this  
32 virus again, becoming the state with the highest number of cases, unlike other states  
33 where the numbers were declining since 2009. In 2012, Santa Catarina, the state just

1 above RS, was the state with the most substantial number of cases, surpassing Sao  
2 Paulo in 2013, with a decrease in the number of cases in the three states of south.

3 According to the symptoms observed in RS A(H1N1)pdm09 epidemiological data  
4 (Figure 7), chills was the most frequent and more related symptom. Chills showed a  
5 direct relationship with fever, a group of symptoms related to each other, viz.,  
6 arthralgia–myalgia, sore throat–arthralgia, conjunctivitis, and rhinorrhea. The second  
7 frequent symptom was rhinorrhea pertaining to chill, conjunctivitis, and cough. There  
8 was no significant relationship between metabolic diseases, immunosuppression, heart  
9 diseases, and lung disease with other symptoms.

10

## 11 Discussion

12 The pandemic H1N1 virus (2009) is a reassortment between North American triple-  
13 reassortant classical swine virus and Eurasian avian-like swine influenza virus (Morens  
14 *et al.* 2009, Zimmer *et al.* 2009), and in this analysis, it was crucial to consider avian  
15 and swine influenza viruses independently. Strain California/04/2009 was chosen for  
16 comparison because it is a model of transmission (Munster *et al.* 2009) and was also  
17 used for annotation.

18 The small number of amplified samples and an even lower number of overlapping  
19 sequences can be explained by the problem of maintenance of samples as discussed by  
20 Veiga *et al.* (2012). During the pandemic of 2009, the number of patients throughout the  
21 state of RS was considerable and there was no proper way of collecting and storing the  
22 samples (Veiga *et al.* 2012).

23 Samples Brazil/3335/2009 and Brazil/3504/2009 showed the highest similarity to  
24 Guangdong/55/2009 (HQ011424). When this sequence was analyzed in IRD, other 12  
25 similar sequences of segment M were found. One of these sequences was KC876544,  
26 H3N2, from Argentina. Since RS borders Argentina, many of the cases in the state were  
27 from this country, explaining the diversification of this segment in RS. All the RS  
28 sequences, similar to HQ011424 and KC876544, showed S31N substitution related to  
29 decreased resistance to amantadine (Lan *et al.* 2010). Although the NA segment is  
30 important for influenza virus virulence, it is not crucial for virus genome assembly (Gao  
31 *et al.* 2008). According to Gao *et al.* (2012), virus lacking the segments PB2, M, or NP  
32 exhibit low replication rate and are easily lost during passages in eggs, as these  
33 segments seem to recruit other segments during genome packaging. Silent mutations in  
34 the M segment can result in packaging defect in all other segments (Hutchinson *et al.*

1 2008). M1 is an import protein in virus assembly and is responsible for association with  
2 influenza virus RNA and ribonucleoprotein (RNP) for controlling nuclear export and  
3 import of RNP and some functions in transcription inhibition (Baudin *et al.* 1994, 2001;  
4 Bui *et al.* 1996, Huang *et al.* 2001; Whittaker *et al.* 1995). Furthermore, M1/M2 can  
5 change the balance of HA and NA, affecting one or both glycoproteins (Campbell *et al.*  
6 2014). Moreover, M from pH1N1 is essential for virion morphology contributing to HA  
7 recognition, and increased NA activity improves virus transmission (Campbell *et al.*  
8 2014). Experiments using guinea pigs demonstrated that strains without pH1N1 M  
9 could not transmit the virus, whereas those containing NL + M + NA + HA exhibit high  
10 transmission even with a virus dose of 100 plaque forming units (PFU) (Campbell *et al.*  
11 2014). According to van Wielink *et al.* (2012), combined mutations in M and NP lead to  
12 an average decrease in virus titer, whereas mutations in M itself increase the virus titer,  
13 indicating that M alone determines enhanced replication. NS1 is expressed at high  
14 levels after infection and facilitates virus replication (Hale *et al.* 2008). One of the goals  
15 of NS1 is mRNA splicing of the M segment (Robb and Fodor 2012). The increased titer  
16 of delNS1 was due to the M1 amino acid substitution at M86V, a region near to helix  
17 six domain, which is a positively charged surface region (van Wielink *et al.* 2012, Sha  
18 and Luo 1997). Adaptation of M-segment mutations could compensate for the absence  
19 of NS1 protein (delNS1), and these modifications can increase the expression of M1/M2  
20 ratio, even if M2 has silent mutations and M1 with silent or nonsilent mutations that  
21 affect M1 mRNA splicing efficiency (van Wielink *et al.* 2012). M1 and M2 proteins can  
22 alter NA Vmax through alterations in NA incorporation, distribution, or presentation at  
23 the virion surface because the NA cytoplasmic tail interacts in the transmembrane  
24 region with M1 protein (Campbell *et al.* 2014, Ali *et al.* 2000, Barman *et al.* 2001,  
25 Mitnaul *et al.* 1996).

26 In the matrix segment, it was found that substitutions in M1 and M2 were significant in  
27 virulence. M2 has demonstrated resistance to amantadine and rimantadine in case of  
28 S31N substitution (Ilyushina *et al.* 2005), and all RS samples exhibited this trait. This  
29 substitution is present in Guangdong/55/2009 and swine/Jangsu/48/2010, and both  
30 strains are related to the samples analyzed in this study. Swine/Jangsu/48/2010 was  
31 related to Brazil/3012/2009, and Guangdong/55/2009 was nearly related to Brazil/RS-  
32 3335/2009 and Brazil/RS-3504/2009 in the first tree construction with all 466 sequences  
33 using NJ phylogenetic test and was directly related to Brazil/RS-3504/2009 in the  
34 second phylogenetic tree. The patient from whom the sample Brazil/RS-3335/2009 was

1 obtained was the only one who died, indicating highest divergence from all sequences,  
2 similar to samples one and two from Beijing. Substitution at 16 and 55 positions of M2  
3 exhibited enhanced transmission in humans. Sample Brazil/RS-2656/2009 showed  
4 substitution at position 55, in R54L position, which could also be involved in increased  
5 transmission. Fan *et al.* (2009) demonstrated that M gene from H5N1 avian influenza  
6 viruses contributes to virulence difference in mice, whereas other genes could attenuate  
7 pathogenicity. It is important to consider the geographical position of RS. Presence of  
8 an influenza A H3N2 M segment related to pH1N1 M segment from RS is observed  
9 because of the representativeness of this virus reassortment in the pandemic of 2009,  
10 which is similar to swine/texas4199-2/1998 (H3N2) (Chou *et al.* 2011; Webby *et al.*  
11 2000). The most divergent sequences were obtained in M1 of Brazil/RS-3335/2009 and  
12 Brazil/RS-3504/2009. Many differences in sequences were obtained in M1 of  
13 Brazil/RS-1892/2009, Brazil/RS-2009/2009, Brazil/RS-2656/2009, and M2 Brazil/RS-  
14 3435/2009. Sequences Brazil/RS-2905 and Brazil/RS-3538/2009 showed one and two  
15 substitutions in M1, respectively, and Brazil/RS-2014/2009, Brazil/RS-2656/2009,  
16 Brazil/RS-3335/2009 showed one substitution in M2 each. M1 and M2 could have  
17 different morphology as some of the samples exhibited signature virion morphology,  
18 particularly in the M1 sequence. According to Elleman and Barclay (2004), some of the  
19 amino acid morphology determinants in M1 are at residues 41, 95, 218, whereas  
20 Bourmakina and Garcia-Sastre (2003) found residues 95 and 204 in M1 as the  
21 determinants. Roberts *et al.* (1998) found that M1 and M2 were responsible for virion  
22 morphology, including 41 amino acids of M1. Campbell *et al.* (2014) found 13 amino  
23 acid differences, including residues 41, 207, 209, 214 in M1, which was similar to  
24 model of Elleman and Barclay (2004) but included the difference of 14 amino acids in  
25 M2.

26 The highest similarity in the HA segment was obtained between Brazil/RS-2529/2009  
27 and CY075275 from Chile, Brazil/RS-5081/2009 and JN171873 from Quebec, and  
28 Brazil/RS-5377/2009 and CY070245 from England. CY075275 and JN171873 are  
29 similar to GQ166223 from China, a sample that showed a high level of replication and  
30 mutation of inosine at position 32 (Xu *et al.* 2011). The only sample with a mutation at  
31 this site was Brazil/RS-3900/2009 but for glutamic acid. Strains Brazil/RS-2014/2009,  
32 Brazil/RS-2584/2009, Brazil/RS-3093/2009 (sequence MG784980), and Brazil/RS-  
33 3869/2009 showed substitutions in the sialic acid ligation site (Al-Maihi 2007). The

1 most divergent sequence was MG784980, with four mutations in the sialic acid ligation  
2 region.

3 The classical swine influenza virus (SIV) is similar to the 1918 pandemic virus and  
4 remained antigenic and genetically conserved in the USA until the introduction of  
5 H3N2 in 1998 (Vicent *et al.* 2008). In Europe, an avian-like virus, H1N1, was  
6 predominant in swine until the introduction of H3N2 reassortment in the 1980s  
7 (VanReeth 2007). Swine have a receptor for both human and avian influenza viruses  
8 and, thus, have become an essential player for interspecies transmission. In Brazil,  
9 pH1N1 is established in swine populations and may become endemic in the country  
10 (Rajão *et al.* 2013). An experiment using California/04/2009 (H1N1) and  
11 swine/Texas/4199-2/1998 (H3N2) showed that only viruses harboring the M segment  
12 from California/04/2009 exhibited high transmission through the air in guinea pigs  
13 (Chou *et al.* 2011). California/04/2009 is highly transmitted through aerosols, whereas  
14 swine/Texas/4199-2/1998 did not exhibit this capability. These findings could explain  
15 the late substitution of pandemic H1N1 to seasonal H3N2 in RS. Epidemiological data  
16 (Brasil 2012a; Brasil 2012b; Brasil 2013; Brasil 2014; Brasil 2015) have probably  
17 shown a decrease in cases of pH1N1 in comparison to H3N2. Apparently, the H3N2  
18 virus is more infectious than pH1N1 as it has affected more patients than the pandemic  
19 virus, according to this study. This competition could lead to the extinction of the  
20 pandemic virus in Brazil. The most common symptoms were chill and rhinorrhea, but  
21 not fever, which is usual in case of virus infection. Fever is almost always associated  
22 with an immunological response to infection, and this result could indicate why  
23 H1N1pdm09 spread worldwide so quickly.

24 Brazilian SIV HA and NA network suggested a common origin for all virus isolates,  
25 irrespective of the region or host (Rajão *et al.* 2013), which is not the same for  
26 H1N1pdm2009. In a previous study, Sant'Anna *et al.* (2013) found that most of the  
27 Brazilian influenza A pH1N1 sublineages from RS belong to clade 7 (Nelson 2009),  
28 assuming that multiple sublineages were introduced in Brazil. M sequences of this study  
29 showed different origins and a new clade origin, which was observed in HA as well  
30 with Brazil/RS-3093/2009. As M is of avian origin, high divergence in the sequences  
31 could be due to migratory birds that allow new recombination of the virus in avian and  
32 transmission to humans. RS is also an important place for bird birth and migration  
33 during summer and winter. According to Morrison and Ross (1989), there are  
34 representatives of species of birds such as *Calidris sp.*, *Pluvialis sp.*, *Tryngites sp.*,

1 *Sterna sp.*, *Cygnus sp.*, *Dendrocygna sp.*, *Gallinula sp.*, *Plegladis sp.*, *Netta sp.*, and  
2 *Coscoroba sp.* It is possible that the M segment originated from Eurasian avian-like  
3 swine virus and underwent natural selection or even, as discussed by Sant'Anna *et al.*  
4 (2013), founder effect. Thus, as proposed by Ozaki *et al.* (2014), specific host cell  
5 phenotypes may differentially influence virus replication because reassortments  
6 between influenza A H6N1 and influenza A H6N2 PB2 and M repressed replication in  
7 the chicken trachea. In another study, avian mutations in the M segment increased  
8 virulence in mice as M1 protein contributes to the virulence of H5N1 avian influenza  
9 viruses (Fan et al. 2009).

10 The HA sequences (classical swine segment) showed less divergent sequences than M  
11 sequences (avian-like segment). Notably, IRD had 19,018 M and 34,565 HA sequences  
12 until January 16, 2018 in its system. According to this data, the number of HA  
13 sequences is almost the double of M sequences in the genomic database, and this  
14 difference could explain the similarities of HA sequences, which was not observed in  
15 M sequences.

16 Epidemiological data along with molecular analysis of samples obtained from the 2009  
17 pandemic may explain the increased number of cases in RS from 2011 to 2012 and the  
18 consequent increase in cases in 2012 in the states of Santa Catarina and Paraná,  
19 culminating in the highest number of cases in Sao Paulo in 2013. São Paulo is the most  
20 populous state in the country and shows some winter characteristics observed in the  
21 south, such as change in temperature, which in addition to air pollution could explain  
22 the high number of cases in the state. It is possible that differentiated viruses grouped in  
23 a clade apart from the phylogenetic tree have somehow prevailed in the state and have  
24 mutated to a more virulent form since 2011. As shown by Rajão *et al.* (2017), there are  
25 many reassortments between H1N1pdm09 and H3N2 in swine. These reassortments  
26 include at least one segment of H1N1pdm09 in H3N2, particularly the M segment, and  
27 HA is stable, as shown in this study for humans. As discussed above, RS, just like Santa  
28 Catarina, is a bird migration area, which may have influenced the maintenance of this  
29 virus in the country along with new mutations in the M segment as the M segment  
30 originates from avian or swine. Santa Catarina has most of the swine breeding sites of  
31 the country and could have led to the reassortments between avian and swine viruses.

32

33 Acknowledgments

34 We thank CAPES for the financial support.

1

2 Conflict of interest

3 No conflict of interest declared.

4

5 References

6 Ali, A., Avalos, R.T., Ponimaskin, E. and Nayak, D.P., 2000. Influenza virus assembly:  
7 effect of influenza virus glycoproteins on the membrane association of M1 protein. *J.*  
8 *Virology*. 74: 8709-8719. Doi: 10.1128/JVI.74.18.8709-8719.2000

9 Al-Majhdi, F.N., 2007. Structure of the sialic acid binding site in influenza A virus:  
10 Hemagglutinin. *J. Biol. Chem.* 282: 113-122. Doi: 10.1074/jbc.2007.113.122

11 Amorim, M.J., Bruce, E.A., Read, E.K., Foeglein, A., Mahen, R. et al., 2011. Rab 11-  
12 and microtubule-dependent mechanism for cytoplasmic transport of influenza A virus  
13 RNA. *J. Virol.* 85: 4143-4156. Doi: 10.1128/JVI.02606-10

14 Bastian, M., S. and Jacomy, M., 2009. Gephi: an open source software for exploring and  
15 manipulating networks. *Int AAAI Conf Weblogs Social Media*.

16 Barman, S., Ali, A., Hui, E.K., Adhikary, L. and Nayak, D.P., 2001. Transport of viral  
17 proteins to the apical membranes and interaction of matrix protein with glycoproteins in  
18 the assembly of influenza viruses. *Virus Res.* 77: 61-69. Doi:10.1016/S0168-  
19 1702(01)00266-0

20 Baudin, F., Bach, C., Cusak, S. and Ruigrok, R.W., 1994. Structure of influenza virus  
21 RNP. I. Influenza virus nucleoprotein melts secondary structure in panhandle RNA and  
22 exposes the bases to solvent. *EMBO J.* 13: 3158-3165. PMID: 8039508. PMCID:  
23 PMC395207.

24 Baudin, F., Petit, I., Weissenhorn, W. and Ruigrok, R.W., 2001. In vitro dissection of  
25 the membrane and RNP binding activities of influenza virus M1 protein. *Virology*. 281:  
26 102-108. doi:10.1006/viro.2000.0804

27 Bourmakina, S.V. and García-Sastre, A., 2003. Reverse genetics studies on the  
28 filamentous morphology of influenza A virus. *J. Gen. Virol.* 84: 517-527. Doi:  
29 10.1099/vir.0.18803-0

30 Brasil, 2012a. Informe Técnico de Influenza, Secretaria da Saúde.  
31 [http://portalsaude.saude.gov.br/images/pdf/2014/maio/22/informe-influenza-2009-2010-](http://portalsaude.saude.gov.br/images/pdf/2014/maio/22/informe-influenza-2009-2010-2011-220514.pdf)  
32 [2011-220514.pdf](http://portalsaude.saude.gov.br/images/pdf/2014/maio/22/informe-influenza-2009-2010-2011-220514.pdf)

- 1 Brasil, 2012b. Boletim Informativo, Secretaria da Saúde: Semana epidemiológica 52.
- 2 [http://u.saude.gov.br/images/pdf/2014/maio/22/boletim-influenza-se52de2012-](http://u.saude.gov.br/images/pdf/2014/maio/22/boletim-influenza-se52de2012-220514.pdf)
- 3 [220514.pdf](http://u.saude.gov.br/images/pdf/2014/maio/22/boletim-influenza-se52de2012-220514.pdf)
- 4 Brasil, 2013. Boletim Informativo, Secretaria da Saúde: Semana epidemiológica 52.
- 5 [http://u.saude.gov.br/images/pdf/2014/maio/22/boletim-influenza-se52de2013-](http://u.saude.gov.br/images/pdf/2014/maio/22/boletim-influenza-se52de2013-220514.pdf)
- 6 [220514.pdf](http://u.saude.gov.br/images/pdf/2014/maio/22/boletim-influenza-se52de2013-220514.pdf)
- 7 Brasil, 2014. Boletim Informativo, Secretaria da Saúde: Semana epidemiológica 53.
- 8 [http://portalsaude.saude.gov.br/images/pdf/2015/fevereiro/06/Boletim-Epidemiol--gico-](http://portalsaude.saude.gov.br/images/pdf/2015/fevereiro/06/Boletim-Epidemiol--gico-Influenza-SE53-2014.pdf)
- 9 [Influenza-SE53-2014.pdf](http://portalsaude.saude.gov.br/images/pdf/2015/fevereiro/06/Boletim-Epidemiol--gico-Influenza-SE53-2014.pdf)
- 10 Brasil, 2015. Boletim Informativo, Secretaria da Saúde: Semana epidemiológica 42.
- 11 [http://portalsaude.saude.gov.br/images/pdf/2015/novembro/03/Boletim-Epidemiol--](http://portalsaude.saude.gov.br/images/pdf/2015/novembro/03/Boletim-Epidemiol--gico-Influenza-SE42-2015.pdf)
- 12 [gico-Influenza-SE42-2015.pdf](http://portalsaude.saude.gov.br/images/pdf/2015/novembro/03/Boletim-Epidemiol--gico-Influenza-SE42-2015.pdf)
- 13 Bui, M., Whittaker, G. and Helenius, A., 1996. Effect of M1 protein and low pH on
- 14 nuclear transport of influenza virus ribonucleoproteins. *J. Virol.* 70: 8391-8401. PMID:
- 15 8970960. PMCID: PMC190928
- 16 Campbell, P.J., Danzy, S., Kyriakis, C.S., Deymier, M.J., Lowen, A.C. et al., 2014. The
- 17 M segment of 2009 pandemic influenza virus confers increased neuraminidase activity,
- 18 filamentous morphology and efficient contact transmissibility to A/Puerto Rico/8/1934-
- 19 based reassortant viruses. *J. Virol.* 88: 3802-3814. Doi: 10.1128/JVI.03607-13.
- 20 Chou, Y., Albrecht, R.A., Pica, N., Lowen, A.C., Richt, J.A. et al., 2011. The M
- 21 segment of the 2009 new pandemic H1N1 influenza virus is critical for its high
- 22 transmission efficiency in the guinea pig model. *J. Virol.* 85: 11235-11241. Doi:
- 23 10.1128/JVI.05794-11.
- 24 Elleman, C.J. and Barclay, W.S., 2004. The M1 matrix protein controls the filamentous
- 25 phenotype of influenza A virus. *Virol.* 321: 144-153. Doi: 10.1016/j.virol.2003.12.009
- 26 Ghedin, E., 2005. Large-scale sequencing of human influenza reveals the dynamic
- 27 nature of viral genome evolution. *Nature* 437: 1162–1166. Doi:10.1038/nature04239.
- 28 Fan, S., Deng, G., Song, J., Tian, G., Suo, Y., et al., 2009. Two amino acid residues in
- 29 the matrix protein M1 contribute to the virulence difference of H5N1 avian influenza
- 30 viruses in mice. *Virol.* 384: 28-32. Doi:10.1016/j.virol.2008.11.044.
- 31 Gao, Q., Chou, Y., Doganay, S., Vafabakhsh, R., Ha, T., et al., 2012. The influenza A
- 32 virus PB2, PA, NP and M segments play a pivotal role during genome packaging. *J*
- 33 *Virol.* 86: 7043-7051. Doi: 10.1128/JVI.00662-12



- 1 Gao, Q., Brydon, E. W. and Palese, P., 2008. A seven-segmented influenza A virus  
2 expressing the influenza C virus glycoprotein HEF. *J. Virol.* 82: 6419-6426. Doi:  
3 10.1128/JVI.00514-08
- 4 Hale, B. G., Randall, R.E., Ortin, J. and Jackson D., 2008. The multifunctional NS1  
5 protein of influenza A viruses. *J. Gen. Virol.* 89: 2359-2376. Doi:  
6 10.1099/vir.0.2008/004606-0
- 7 Hall, T.A., 1999. BioEdit: a user-friendly biological sequence alignment editor and  
8 analysis program for Windows 95/98/NT. *Nucl. Acids Symp.* 41: 95-98.
- 9 Huang, X., Liu, T., Muller, J., Levandowski, R.A. and Ye, Z., 2001. Effect of influenza  
10 virus matrix protein and viral RNA on ribonucleoprotein formation and nuclear export.  
11 *Virology* 287: 405-416. Doi:10.1006/viro.2001.1067
- 12 Hutchinson, E.C., Curran, M.D., Read, E.K., Gog, J.R. and Digard, P., 2008. Mutational  
13 analysis of cis-acting RNA signals in segment 7 of influenza A virus. *J. Virol.* 82:  
14 11869-11879. Doi: 10.1128/JVI.01634-08
- 15 Ilyushina, N.A., Govorkova, E.A. and Webster, R.G., 2005. Detection of amantadine-  
16 resistant variants among avian influenza viruses isolated in North America and Asia.  
17 *Virology* 341: 102 – 106. Doi:10.1016/j.viro.2005.07.003
- 18 Kumar, S., Stecher, G. and Tamura K., 2016. MEGA7: Molecular Evolutionary  
19 Genetics Analysis version 7.0 for bigger datasets. *Mol. Biol. Evol.* 33: 1870-1874. Doi:  
20 10.1093/molbev/msw054.
- 21 Lan, Y., Zhang, Y., Dong, L., Wang, D., Huang, W., et al., 2010. A comprehensive  
22 surveillance of adamantane resistance among human influenza A virus isolated from  
23 mainland China Between 1956 and 2009. *Antivir. Ther.* 16: 853-859. Doi  
24 10.3851/IMP1656.
- 25 Letunic, I. and Bork, P., 2011. Interactive Tree Of Life v2: online annotation and  
26 display of phylogenetic trees made easy. *Nucleic Acids Res.*, 1-4. Doi:  
27 10.1093/nar/gkr201
- 28 Lynch, J.P. and Walsh, E.E., 2007. Influenza: evolving strategies in treatment and  
29 prevention. *Semin. Respir. Crit. Care Med.* 28: 144–158. Doi:10.1055/s-2007-976487.
- 30 Marsh, G.A., Rabadan, R., Levine, A. J. and Palese, P., 2008. Highly conserved regions  
31 of influenza A virus polymerase gene segments are critical for efficient viral RNA  
32 packaging. *J. Virol.* 82: 2295-2304. Doi: 10.1128/JVI.02267-07
- 33 Mills, C.E., Robins, J.M. and Lipsitch, M., 2004. Transmissibility of 1918 pandemic  
34 influenza. *Nature* 432: 904–906. Doi:10.1038/nature03063.

- 1 Mitnaul, L.J., Castrucci, M.R., Murti, K.G. and Kawaoka, Y., 1996. The cytoplasmic  
2 tail of influenza A virus neuraminidase (NA) affects NA incorporation into virions,  
3 virion morphology, and virulence in mice but is essential for virus replication. *J Virol.*  
4 70: 873-879. PMID: 8551626 PMCID: PMC189890
- 5 Morens, D.M., Taubenberger, J.K. and Fauci, A.S., 2009. The Persistent Legacy of the  
6 1918 Influenza Virus. *N. Engl. J. Med.* 361: 225-229. Doi: 10.1056/NEJMp0904819
- 7 Morrison, R.I.G. and Ross, R.K., 1989. *Atlas of Nearctic shorebirds on the coast of*  
8 *South America*, v 2. Ottawa: Canadian Wildlife Service Special Publication. 325 p.
- 9 Munster, V.J., de Wit, E., van den Brand, J.M., Herfst, S., Schrauwen, E.J., et al., 2009.  
10 Pathogenesis and transmission of swine-origin 2009 A(H1N1) influenza virus in ferrets.  
11 *Science* 325: 481-483. Doi: 10.1126/science.1177127
- 12 Nelson, M., Spiro, D., Wentworth, D., Beck, E., Fan, J., et al., 2009.  
13 The early diversification of influenza A/H1N1pdm. *PLoS Curr* 1: RRN1126.  
14 Doi: 10.1371/currents.RRN1126
- 15 Ozaki, H., Guan, Y., Peiris, M., Webster, R., Takada, A., et al., 2014. Effect of the PB2  
16 and M genes on the replication of H6 influenza virus in chickens. *Influenza Res. Treat.*  
17 2014: 547839. doi: 10.1155/2014/547839
- 18 Rajão, D.S., Costa, A.T.R., Brasil, B.S.A., Del Puerto, H.L., Oliveira, F.G., et al., 2013.  
19 Genetic characterization of influenza virus circulating in Brazilian pigs during 2009 and  
20 2010 reveals a high prevalence of the pandemic H1N1 subtype. *Influenza Other Respir.*  
21 *Viruses* 7: 783-90. Doi: 10.1111/irv.12072.
- 22 Rajão, D.S., Walia, R.R., Campbel, B., Cauger, P.C, Janas-Martindale, A., et al., 2017.  
23 Reassortment between Swine H3N2 and 2009 pandemic H1N1 in the United States  
24 resulted in influenza A viruses with diverse genetic constellations with variable  
25 virulence in pigs. *J. Virol.* 91: e01763-16. Doi: 10.1128/JVI01763-16.
- 26 Robb, N.C. and Fodor, E., 2012. The accumulation of influenza A virus segment 7  
27 spliced mRNAs is regulated by the NS1 protein. *J. Gen. Virol.* 93: 113-118. Doi:  
28 10.1099/vir.0.035485-0
- 29 Roberts, P.C., Lamb, R.A. and Compans, R.W., 1998. The M1 and M2 proteins of  
30 influenza A virus are important determinants in filamentous particle formation. *Virol.*  
31 240: 127-137. Doi: 10.1006/viro.1997.8916
- 32 Saitou, N. and Nei, M., 1987. The neighbor-joining method: A new method for  
33 reconstructing phylogenetic trees. *Mol. Biol. Evol.* 4: 406-425. Doi:  
34 10.1093/oxfordjournal.molbev.a040454

- 1 Sant'Anna, F.H., Borges, L.G.A., Fallavena, P.R.V., Gregianini, T.S., Matias, F., et al.,  
2 2014. Genomic analysis of pandemic and post-pandemic influenza A pH1N1 viruses  
3 isolated in Rio Grande do Sul, Brazil. *Arch. Virol.* 159: 621-630. Doi: 10.1007/s00705-  
4 013-1855-8.
- 5 Schnitzler, S.U. and Schnitzler, P., 2009. An update on swine-origin influenza virus  
6 A/H1N1: a review. *Virus genes* 39, 279-292. Doi: 10.1007/s11262-009-0404-8
- 7 Sha, B. and Luo, M., 1997. Structure of a bifunctional membrane-RNA binding protein,  
8 influenza virus matrix protein M1. *Nat. Struct. Biol.* 4: 239-244. Doi:10.1038/nsb0397-  
9 239
- 10 Smith, G.J., Vijaykrishna, D., Bahl, J., Lycett, S.J., Worobey, M., et al., 2009. Origins  
11 and evolutionary genomics of the 2009 swine-origin H1N1 influenza A epidemic.  
12 *Nature* 459: 1122-1125. Doi: 10.1038/nature08182.
- 13 Staden, R., 1996. Indexing and using sequence databases. *Methods Enzymol.* 266: 105-  
14 114. Doi:10.1016/S0076-6879(96)66009-1
- 15 Tamura, K., Nei, M. and Kumar, S., 2004. Prospects for inferring very large  
16 phylogenies by using the neighbor-joining method. *PNAS* 101: 11030-11035. Doi:  
17 10.1073/pnas.0404206101
- 18 VanReeth, K., 2007. Avian and swine influenza viruses: our current understanding of  
19 the zoonotic risk. *Vet. Res.* 38: 243-260. Doi: 10.1051/vetres:2006062
- 20 van Wielink, R., Harmsen, M.M., Martens, D.E., Peeters, B.P.H., Wijffels, R.H., et al.,  
21 2012. Mutations in the M-gene segment can substantially increase replication efficiency  
22 of NS1 deletion influenza A virus in MDCK cells. *J. Virol.* 86: 12341-12350. Doi:  
23 10.1128/JVI.01725-12
- 24 Veiga, A.B.G., Kretzmann, N.A., Corrêa, L.T., Goshiyama, A.M., Baccin, T., et al.,  
25 2012. Viral load and epidemiological profile of patients infected by pandemic influenza  
26 A (H1N1) 2009 and seasonal influenza A virus in Southern Brazil. *J. Med. Virol.* 84:  
27 371-379. Doi: 10.1002/jmv.23198.
- 28 Vicent, A.L., Ma, W., Lager, K.M., Janke, B.H. and Richt, J.A., 2008. Swine influenza  
29 viruses: a North American perspective. *Adv. Virus Res.* 72: 127-154. Doi:  
30 10.1016/S0065-3527(08)00403-X.
- 31 Webby, R.J., Swenson, S.L., Krauss, S.L., Gerrish, P.J., Goyal, S.M., et al., 2000.  
32 Evolution of swine H3N2 influenza viruses in the United States. *J. Virol.* 74: 8243-  
33 8251. PMID: 10954521. PMCID: PMC116332.

- 1 Whittaker, G., Kemler, I. and Helenius, A., 1996. Mechanism for inhibition of influenza  
2 virus RNA polymerase activity by matrix protein. *J. Virol.* 70: 241-247. Doi:  
3 10.1006/viro.2001.1067
- 4 WHO - World Health Organization, 2013. Overview of the emergence and  
5 characteristics of the avian influenza A (H7N9) virus.  
6 [http://www.who.int/influenza/human\\_animal\\_interface/influenza\\_h7n9/WHO\\_H7N9\\_r](http://www.who.int/influenza/human_animal_interface/influenza_h7n9/WHO_H7N9_review_31May13.pdf?ua=1)  
7 [view\\_31May13.pdf?ua=1](http://www.who.int/influenza/human_animal_interface/influenza_h7n9/WHO_H7N9_review_31May13.pdf?ua=1)
- 8 Xu, L., Bao, L., Zhou, J., Wang, D., Deng, W., et al., 2011. Genomic polymorphism of  
9 the pandemic A (H1N1) influenza viruses correlates with viral replication, virulence,  
10 and pathogenicity in vitro and in vivo. *PLoS One* 6: e20698. Doi:  
11 10.1371/journal.pone.0020698
- 12 Yang, J., Yang, F., Huang, F., Wang, J. Jin, Q., et al., 2009. Subclinical infection with  
13 the novel influenza A (H1N1) Virus. *Clin. Infect. Dis.* 49: 1622-1623.
- 14 Zimmer, S.M. and Burke, D.S., 2009. Historical Perspective — Emergence of Influenza  
15 A (H1N1) Viruses. *N. Engl. J. Med.* 361: 279-285. Doi: 10.1056/NEJMra0904322

16 Table 1: Primers used in this work.

| Primer Name | Primer Sequence                          | Segment | Approach | Reference |
|-------------|------------------------------------------|---------|----------|-----------|
| MF1         | CGAGGTCGAAACGTACGTTT                     | M       | 1        | This work |
| MR1         | CAGACCAGCACTGGAGCTAG                     |         | 2        | This work |
| MF2         | AGATCGCGCAGAGACTGGAAAGT                  |         | 3        | JCVI      |
| MR2         | TCTTTCAGACCAGCACTGGAGCTA                 |         |          |           |
| MP1F        | TGTA AAAACGACGGCCAGTAGCRAAAGCAGG         |         |          |           |
| MP5F        | TGTA AAAACGACGGCCAGTAAAGCAGGTAGATRTT     |         |          |           |
| MP289F      | TGTA AAAACGACGGCCAGTGAYCCRAAAYAACATGG    |         |          |           |
| MP388F      | TGTA AAAACGACGGCCAGTGGTGCACCTTGCCWG      |         |          |           |
| MP622F      | TGTA AAAACGACGGCCAGTGCNGAGGCYATGGA       |         |          |           |
| MP407R      | CAGGAAACAGCTATGACCTRCARCWGGCAAGTGCACC    |         |          |           |
| MP502R      | CAGGAAACAGCTATGACCTGCTGKGARTCAGCAATYTG   |         |          |           |
| MP740R      | CAGGAAACAGCTATGACCCCTGYAAATTTTCAAGAAGATC |         |          |           |
| MP1010R     | CAGGAAACAGCTATGACCTTTTTACTCYAGCDCTATG    |         |          |           |
| MP1027R     | CAGGAAACAGCTATGACCAGTAGAAACAAGGTAGTTTT   |         |          |           |
| HAF1        | CATGTCCTCATGCTGGAGC                      | HA      | 1        | This work |
| HAR1        | CTCGTCAATGGCATTCTGTG                     |         | 2        | This work |
| HAF2        | ACCCAAAGCTCAGCAAATCCTACA                 |         |          |           |
| HAR2        | TCTTCAGGTCGGCTGCATATCCT                  |         |          |           |

17

18

19

20

21 Table 2: Number of cases and death caused by influenza A pH1N1 in Brazil from 2009 to 2015.

|                  | Year<br>Influenza<br>A | 2009   |           | 2010  |         | 2011  |        | 2012  |         | 2013* |           |       |         | 2014  |            |       |         | 2015** |          |       |          |
|------------------|------------------------|--------|-----------|-------|---------|-------|--------|-------|---------|-------|-----------|-------|---------|-------|------------|-------|---------|--------|----------|-------|----------|
|                  |                        | pH1N1  |           | pH1N1 |         | pH1N1 |        | pH1N1 |         | pH1N1 |           | H3N2  |         | pH1N1 |            | H3N2  |         | pH1N1  |          | H3N2  |          |
|                  |                        | Cases  | Death     | Cases | Death   | Cases | Death  | Cases | Death   | Cases | Death     | Cases | Death   | Cases | Death      | Cases | Death   | Cases  | Death    | Cases | Death    |
| Brazilian region | North                  | 868    | 50        | 319   | 48      | 2     | 0      | 20    | 7       | 114   | 27        | 6     | 2       | 14    | 7          | 18    | 2       | 2      | 0        | 12    | 3        |
|                  | Northeast              | 846    | 62        | 152   | 23      | 1     | 0      | 76    | 12      | 116   | 29        | 32    | 2       | 33    | 7          | 26    | 3       | 2      | 0        | 37    | 1        |
|                  | Southeast              | 12,104 | 992       | 120   | 17      | 60    | 6      | 508   | 118     | 2,466 | 537       | 203   | 28      | 171   | 66         | 486   | 60      | 19     | 6        | 230   | 35       |
|                  | South                  | 35,397 | 789       | 364   | 21      | 112   | 14     | 1,884 | 189     | 911   | 139       | 405   | 24      | 96    | 25         | 438   | 30      | 81     | 17       | 208   | 15       |
|                  | Center West            | 1,267  | 167       | 18    | 4       | 6     | 1      | 123   | 25      | 121   | 32        | 22    | 5       | 150   | 58         | 74    | 10      | 5      | 3        | 53    | 13       |
|                  | Total Brazil           | 50,482 | 2,060 (4) | 973   | 113(11) | 181   | 21(11) | 2611  | 351(13) | 3733  | 768(20.6) | 668   | 61(9.1) | 464   | 163 (35.1) | 1,042 | 105(10) | 109    | 26(23.8) | 540   | 67(12.4) |

22 \* Starts co-circulation of H3N2 cases in 2013: 668 cases with 61 deaths; 2014: 887 cases, 82 deaths.

23 \*\* Data until October 2015.

24 Table 3: Strategy of primers used in this work.

| Primers                  | Amplicon size      | Strategy | Result                              |
|--------------------------|--------------------|----------|-------------------------------------|
| HAF1 + HAR1<br>MF1 + MR1 | ~700 bp<br>~700 bp | 1        | Few positives                       |
| HAF2 + HAR2<br>MF2 + MR2 | 627 bp<br>625 bp   | 2        | Few positives, more than strategy 1 |
| MP1F + MP407R            | 406 bp             | 3        | Negative                            |
| MP1F + MP740R            | 739 bp             |          | Negative                            |
| MP5F + MP502R            | 497 bp             |          | Negative                            |
| MP289F + MP740R          | 451 bp             |          | Positive                            |
| MP388F + MP1010R         | 633 bp             |          | Positive                            |
| MP388F + MP1027R         | 639 bp             |          | 40 positives                        |
| MP622F + MP1027R         | 405 bp             |          | Positive                            |
| MF1 + MP740R             | 739 bp             |          | 30 positives                        |

25 Shadow: primers used to obtain partial M and HA segment.

26 Table 4: Amino acids substitutions, insertions and deletions in M1 and M2 proteins of RS influenza virus pH1N1.

| Strains                        | M1            |    |    |    |    |     |          |            |       |         |         | M2            |    |    |    |    |    |    |
|--------------------------------|---------------|----|----|----|----|-----|----------|------------|-------|---------|---------|---------------|----|----|----|----|----|----|
|                                | Substitutions |    |    |    |    |     |          | Insertions |       |         |         | Substitutions |    |    |    |    |    |    |
|                                | 47            | 54 | 73 | 91 | 96 | 196 | 197      | 198        | 74/75 | 197/198 | 200/201 | 54            | 77 | 85 | 86 | 91 | 94 | 95 |
| FJ969513 A/California/04/2009  | K             | P  | G  | N  | A  | S   | E        | Q          | 0     | 0       | 0       | R             | Q  | D  | V  | F  | I  | E  |
| KU143699 A/Brazil/RS-1805/2009 | *             | *  | *  | *  | *  | *   | *        | *          | 0     | 0       | 0       | *             | *  | *  | *  | *  | *  | *  |
| KU143701 A/Brazil/RS-1892/2009 | *             | *  | A  | *  | *  | *   | T        | T          | R     | K       | S       | *             | *  | *  | *  | *  | *  | *  |
| KU143695 A/Brazil/RS-2009/2009 | *             | *  | A  | *  | *  | *   | T        | T          | R     | K       | S       | *             | *  | *  | *  | *  | *  | *  |
| KU143697 A/Brazil/RS-2014/2009 | *             | *  | *  | *  | *  | *   | *        | *          | 0     | 0       | 0       | *             | *  | *  | *  | *  | *  | K  |
| KU143694 A/Brazil/RS-2543/2009 | *             | *  | *  | *  | *  | *   | *        | *          | 0     | 0       | 0       | *             | *  | *  | *  | *  | *  | *  |
| KU143691 A/Brazil/RS-2656/2009 | *             | *  | *  | *  | T  | R   | deletion | T          | 0     | 0       | S       | L             | *  | *  | *  | *  | *  | *  |
| KU143689 A/Brazil/RS-2763/2009 | *             | *  | *  | *  | *  | *   | *        | *          | 0     | 0       | 0       | *             | *  | *  | *  | *  | *  | *  |
| KU143703 A/Brazil/RS-2905/2009 | *             | *  | *  | Q  | *  | *   | *        | *          | 0     | 0       | 0       | *             | *  | *  | *  | *  | *  | *  |
| KU143706 A/Brazil/RS-3012/2009 | *             | *  | *  | *  | *  | *   | *        | *          | 0     | 0       | 0       | *             | *  | *  | *  | *  | *  | *  |
| KU143696 A/Brazil/RS-3082/2009 | *             | *  | *  | *  | *  | *   | *        | *          | 0     | 0       | 0       | *             | *  | *  | *  | *  | *  | *  |
| KU143700 A/Brazil/RS-3093/2009 | *             | *  | *  | *  | *  | *   | *        | *          | 0     | 0       | 0       | *             | *  | *  | *  | *  | *  | *  |
| KU143688 A/Brazil/RS-3435/2009 | *             | *  | *  | *  | *  | *   | *        | *          | 0     | 0       | 0       | *             | N  | G  | C  | L  | *  | *  |
| KU143702 A/Brazil/RS-3466/2009 | *             | *  | *  | *  | *  | *   | *        | *          | 0     | 0       | 0       | *             | *  | *  | *  | *  | *  | *  |
| KU143698 A/Brazil/RS-3538/2009 | T             | Y  | *  | *  | *  | *   | *        | *          | 0     | 0       | 0       | *             | *  | *  | *  | *  | *  | *  |
| KU143690 A/Brazil/RS-3908/2009 | *             | *  | *  | *  | *  | *   | *        | *          | 0     | 0       | 0       | *             | *  | *  | *  | *  | *  | *  |
| KU143705 A/Brazil/RS-5081/2009 | *             | *  | *  | *  | *  | *   | *        | *          | 0     | 0       | 0       | *             | *  | *  | *  | *  | *  | *  |
| KU143692 A/Brazil/RS-5377/2009 | *             | *  | *  | *  | *  | *   | *        | *          | 0     | 0       | 0       | *             | *  | *  | *  | *  | *  | *  |
| KU143693 A/Brazil/RS-3335/2009 | [REDACTED]    |    |    |    |    |     |          |            |       |         |         | *             | *  | *  | *  | *  | K  | *  |
| KU143704 A/Brazil/RS-3504/2009 | [REDACTED]    |    |    |    |    |     |          |            |       |         |         | *             | *  | *  | *  | *  | *  | *  |

\* No amino acid change.



28 Table 5: Amino acids substitutions in HA protein of RS influenza virus pH1N1.

| Strains                        | Substitutions |    |    |     |     |     |     |     |     |     |     |     |
|--------------------------------|---------------|----|----|-----|-----|-----|-----|-----|-----|-----|-----|-----|
|                                | 32            | 38 | 65 | 105 | 113 | 136 | 137 | 138 | 139 | 141 | 164 | 167 |
| FJ966082 A/California/04/2009  | Q             | A  | D  | G   | T   | Q   | N   | I   | H   | I   | I   | I   |
| MG785398 A/Brazil/RS-1865/2009 | *             | *  | *  | *   | *   | *   | *   | *   | *   | *   | V   | *   |
| MG784979 A/Brazil/RS-2014/2009 | *             | *  | *  | *   | *   | H   | *   | *   | *   | *   | V   | *   |
| MG785405 A/Brazil/RS-2529/2009 | *             | *  | *  | E   | *   | *   | *   | *   | *   | *   | V   | *   |
| MG784978 A/Brazil/RS-2543/2009 | *             | *  | *  | *   | *   | *   | *   | *   | *   | *   | V   | *   |
| MG785399 A/Brazil/RS-2584/2009 | *             | *  | *  | *   | *   | H   | *   | *   | *   | *   | V   | *   |
| MG784976 A/Brazil/RS-2656/2009 | *             | *  | *  | *   | *   | *   | *   | *   | *   | *   | V   | *   |
| MG784980 A/Brazil/RS-3093/2009 | *             | *  | *  | *   | *   | *   | D   | M   | Q   | T   | -   | -   |
| MG785403 A/Brazil/RS-3222/2009 | -             | *  | *  | *   | *   | *   | *   | *   | *   | *   | V   | *   |
| MG784981 A/Brazil/RS-3466/2009 | *             | E  | *  | *   | *   | *   | *   | *   | *   | *   | V   | *   |
| MG785400 A/Brazil/RS-3542/2009 | *             | *  | *  | *   | *   | *   | *   | *   | *   | *   | V   | *   |
| MG785402 A/Brazil/RS-3869/2009 | *             | *  | *  | *   | *   | H   | *   | *   | *   | *   | V   | *   |
| MG785397 A/Brazil/RS-3900/2009 | E             | *  | *  | *   | *   | *   | *   | *   | *   | *   | V   | *   |
| MG785406 A/Brazil/RS-4028/2009 | *             | *  | *  | *   | *   | *   | *   | *   | *   | *   | V   | *   |
| MG785401 A/Brazil/RS-4252/2009 | *             | *  | *  | *   | *   | *   | *   | *   | *   | *   | V   | *   |
| MG784982 A/Brazil/RS-5081/2009 | *             | *  | *  | *   | K   | *   | *   | *   | *   | *   | V   | *   |
| MG784977 A/Brazil/RS-5377/2009 | *             | *  | E  | *   | *   | *   | *   | *   | *   | *   | *   | V   |
| MG785404 A/Brazil/RS-5446/2009 | *             | *  | *  | *   | *   | *   | *   | *   | *   | *   | V   | *   |

\* No amino acid change

- No data available

30 Table 6: Cases of influenza A pH1N1 from 2009 to 2014 in Southeast and South of Brazil.

| Brazilian region | State     | Year         |            |            |            |             |            |           |
|------------------|-----------|--------------|------------|------------|------------|-------------|------------|-----------|
|                  |           | 2009         | 2010       | 2011       | 2012       | 2013*       | 2014       | 2015      |
| Southeast        | MG        | 1810         | 8          | 26         | 134        | 425         | 31         | 5         |
|                  | ES        | 110          | 1          | 1          | 0          | 17          | 1          | 0         |
|                  | RJ        | 2777         | 3          | 5          | 4          | 52          | 22         | 0         |
|                  | <b>SP</b> | <b>7407</b>  | <b>108</b> | <b>28</b>  | <b>370</b> | <b>1972</b> | <b>117</b> | <b>14</b> |
| South            | <b>PR</b> | <b>30650</b> | <b>344</b> | <b>2</b>   | <b>621</b> | <b>353</b>  | <b>46</b>  | <b>31</b> |
|                  | <b>SC</b> | <b>2155</b>  | <b>20</b>  | <b>7</b>   | <b>743</b> | <b>225</b>  | <b>21</b>  | <b>50</b> |
|                  | <b>RS</b> | <b>2592</b>  | <b>0</b>   | <b>113</b> | <b>520</b> | <b>333</b>  | <b>29</b>  | <b>0</b>  |

31 Brazilian States: MG - Minas Gerais, ES - Espírito Santo, RJ - Rio de Janeiro, SP - São

32 Paulo, PR - Paraná, SC - Santa Catarina, RS - Rio Grande do Sul.

33

34

35

36

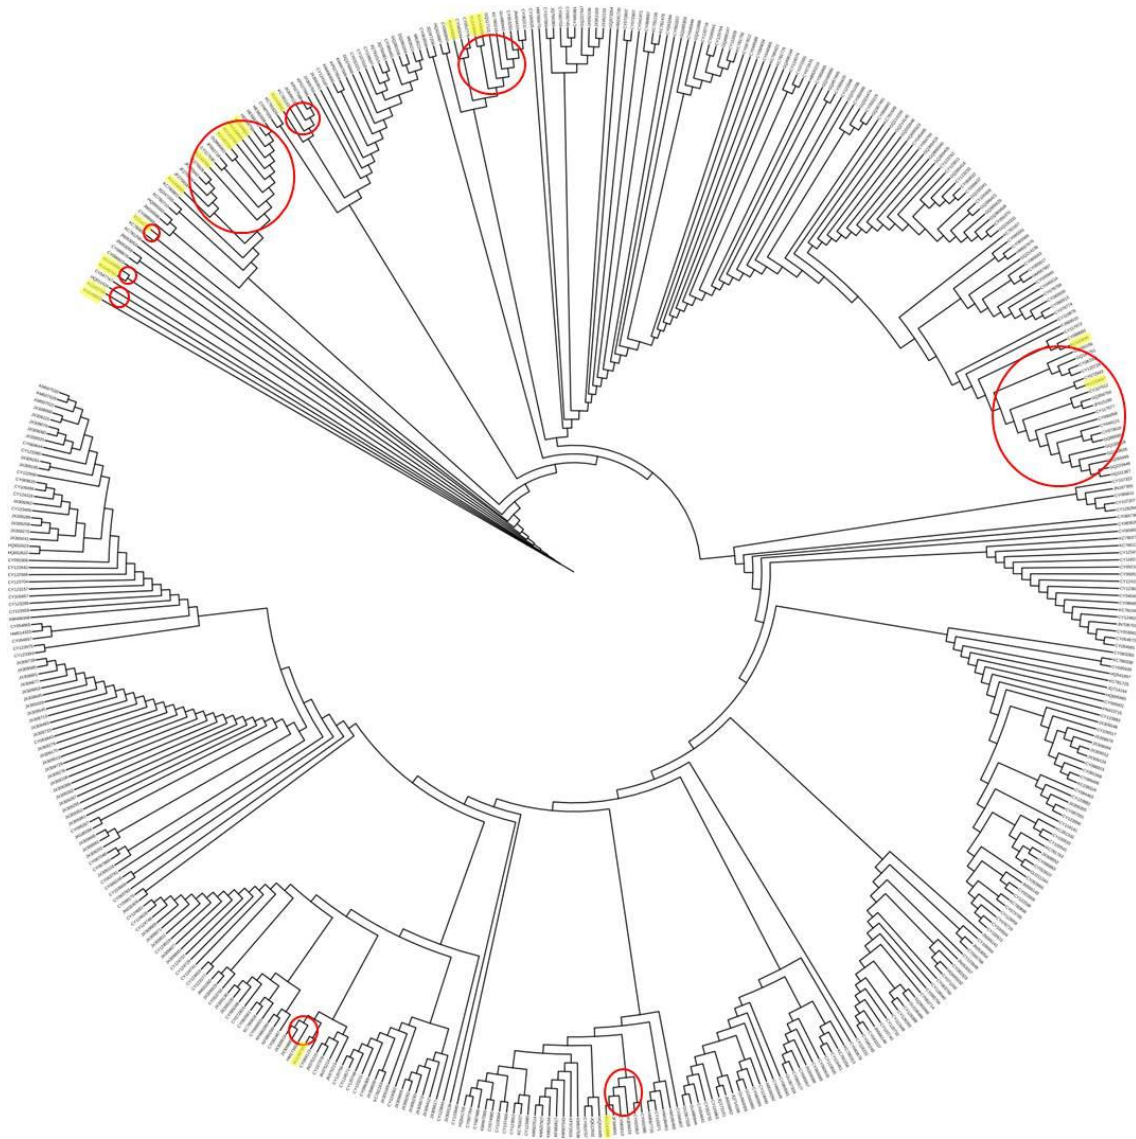

37

38 Figure 1: second selection with 466 sequences all over the world. All sequences of the  
39 branch with some of the RS sequences (yellow squares) were selected (red circles) to  
40 the new alignment.

41

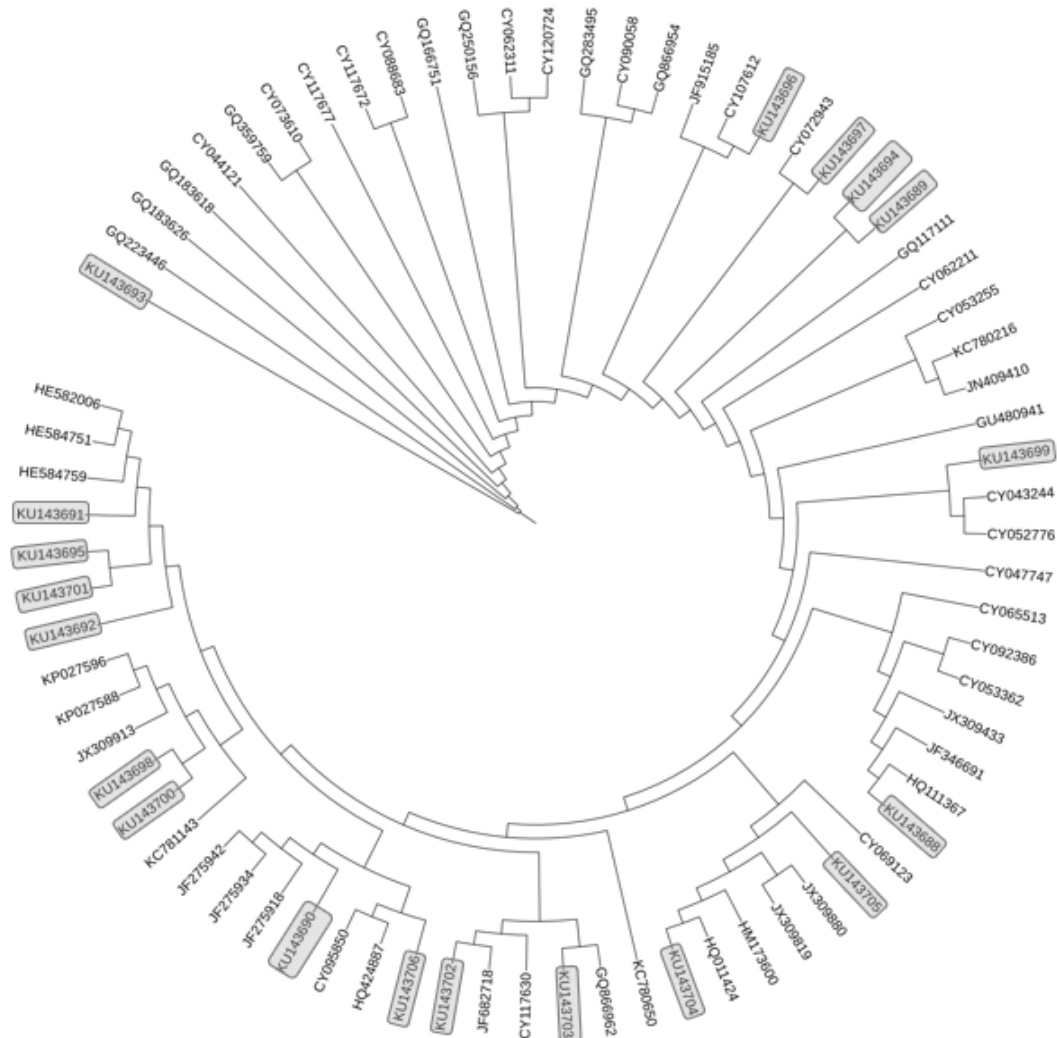

42

43 Figure 2: Final phylogenetic tree with 55 of the most similar sequences related to 19 RS  
44 sequences (gray squares). The most divergent sequence is KU143693 (Brazil/RS-  
45 3335/2009) nearby sequences from Beijing.

46

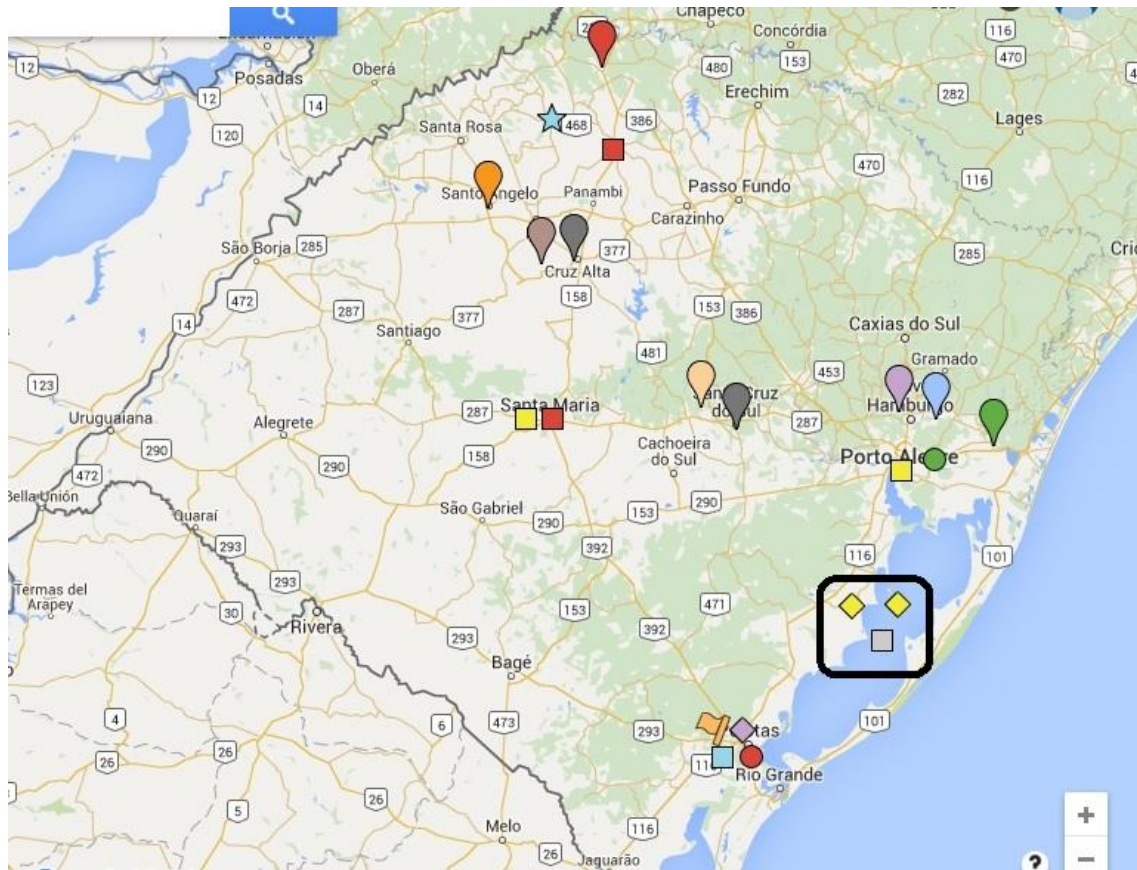

47  
 48 Figure 3: Rio Grande do Sul Map. It is interactive, click the link below and open image.  
 49 Clicking icons, it is possible to see all information about data. The same color is the  
 50 same branch. Drops are the first level, squares are the second level, circles are the third  
 51 level, a rhombus is the fourth level, stars are the fifth level, and flags are the sixth level  
 52 of the same branch of the tree. It is possible to see more similarity between samples  
 53 analyzed in this study than from others. There are only three from RS sequences similar  
 54 to those from theses work (Black Square), and the most similar are from swine and not  
 55 human as yellow color shows.  
 56 (<https://www.google.com/maps/d/edit?mid=zQfm5yljIn54.k7PW6v6h1pJI&usp=sharing>  
 57 [ig](#))  
 58

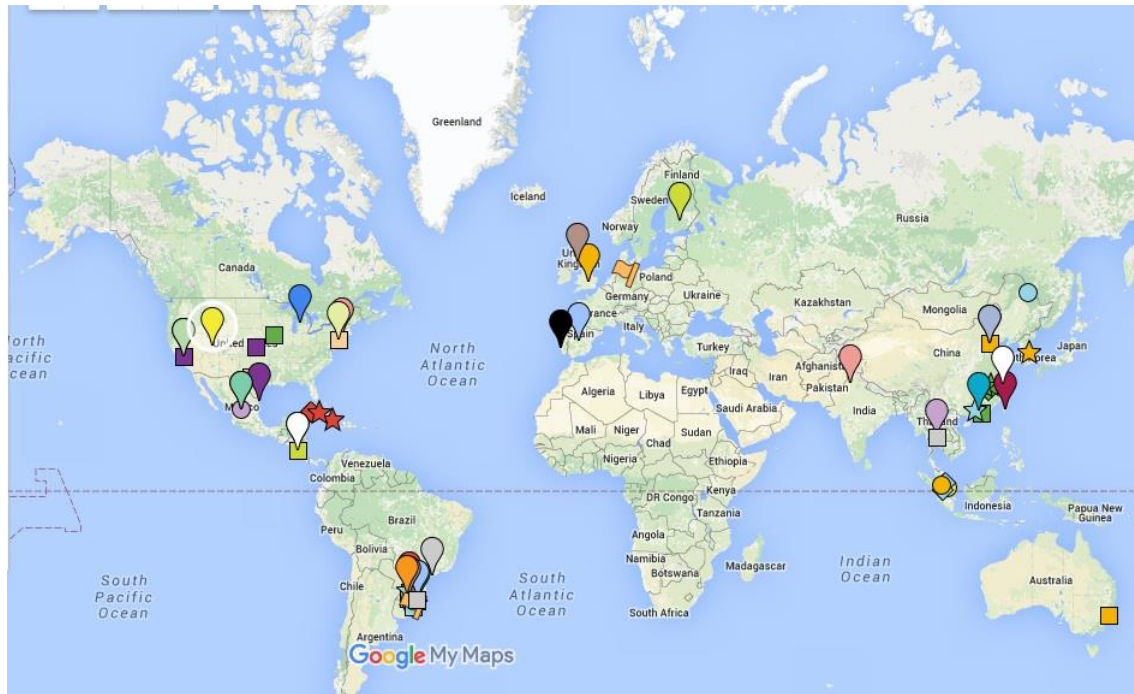

59

60 Figure 4: World Map constructed using phylogeny tree. It is interactive, click the link  
61 below and open image. Clicking on the icons, it is possible to see all information about  
62 data. The same color is the same branch. Drops are the first level, squares are the second  
63 level, circles are the third level, a rhombus is the fourth level, stars are the fifth level,  
64 and flags are the sixth level of the same branch of the tree. It is possible to see that most  
65 similarities were obtained to sequences from USA, Mexico, Western Europe, and  
66 Southeast Asia.

67 (<https://www.google.com/maps/d/edit?mid=zQfm5yljIn54.k7PW6v6h1pJI&usp=sharing>)  
68

69

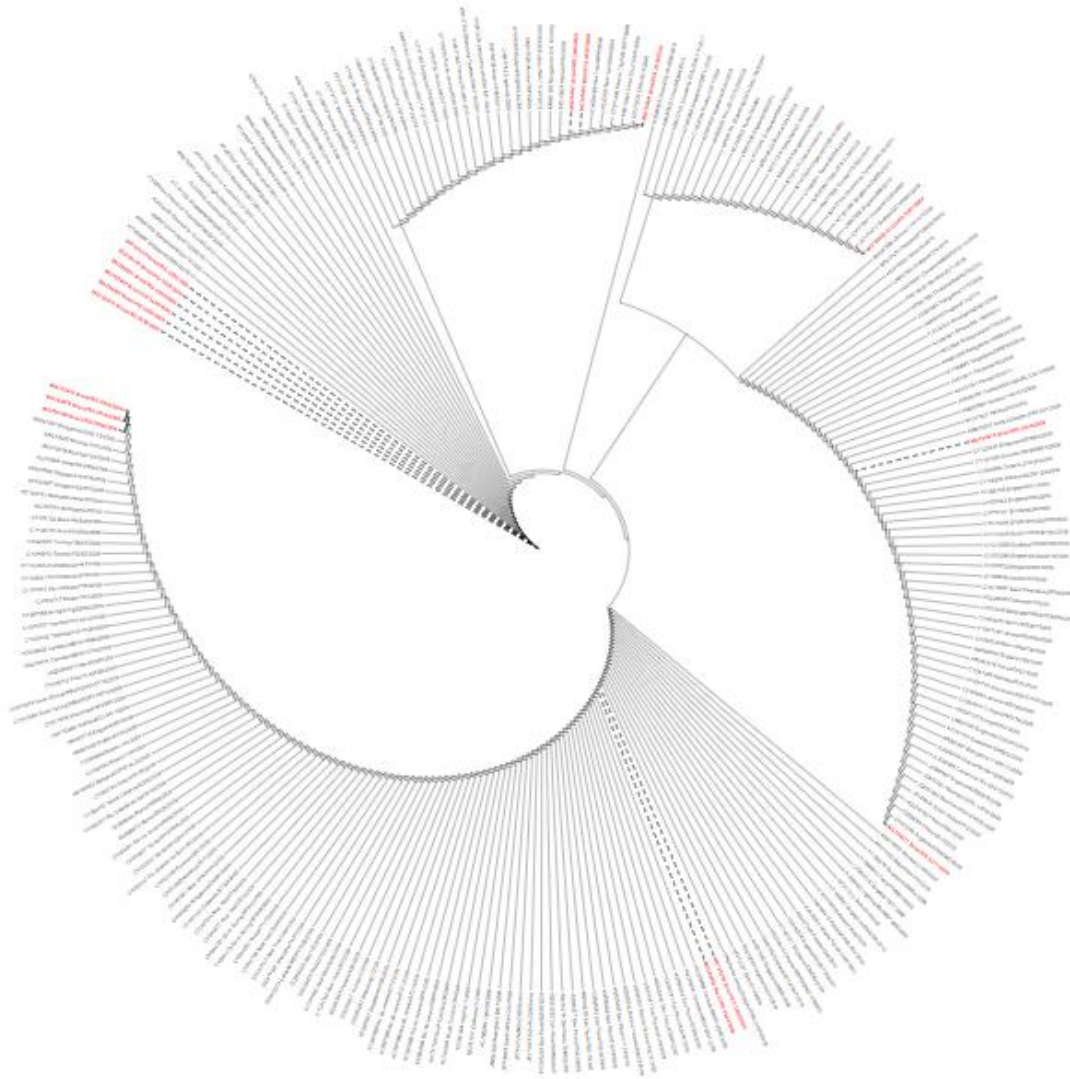

70

71 Figure 5: Final phylogenetic tree with 258 of the most similar sequences related to 17  
72 HA RS sequences (red writing). The most divergent sequence is MG784980 showing  
73 four mutations which led to the formation of a new clade.

74

75

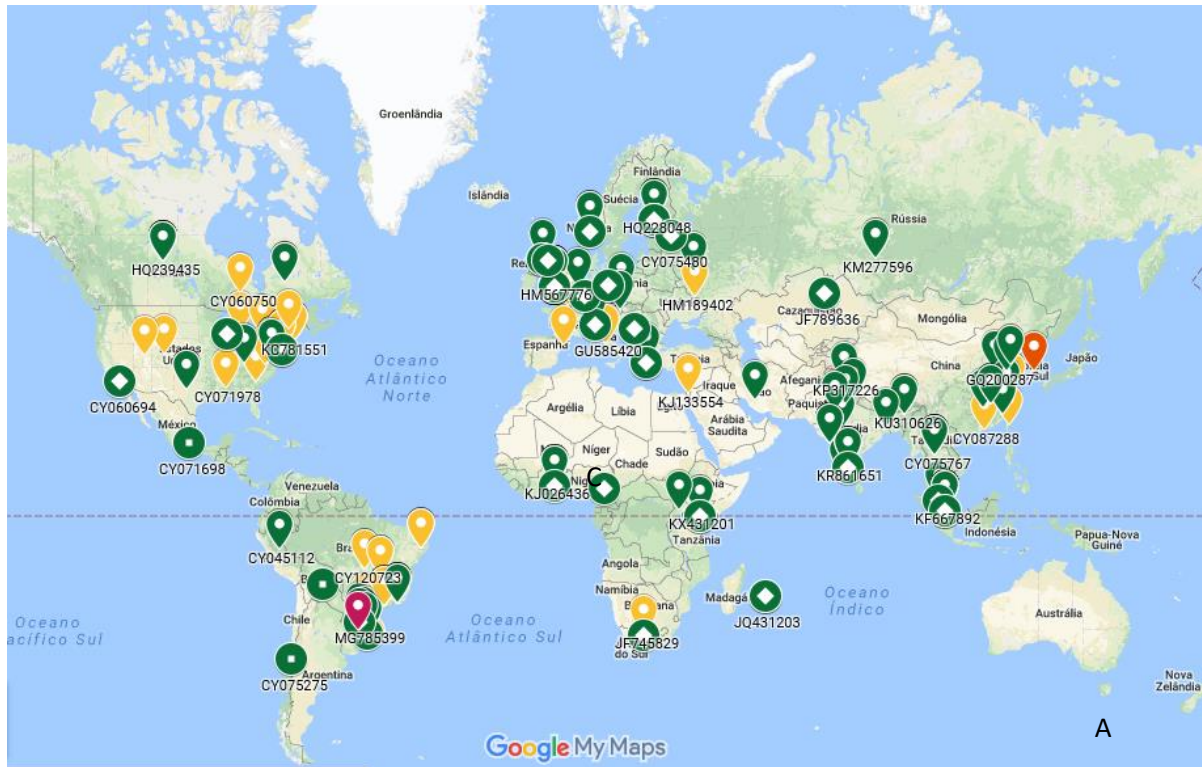

76

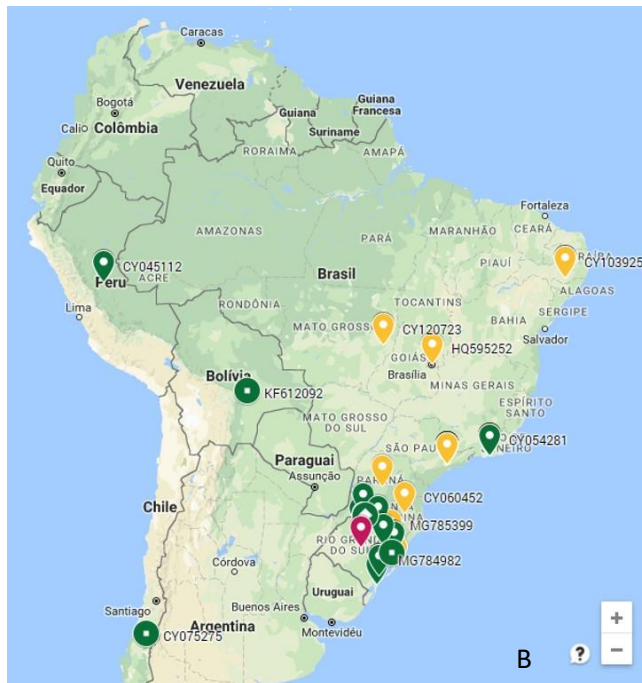

77



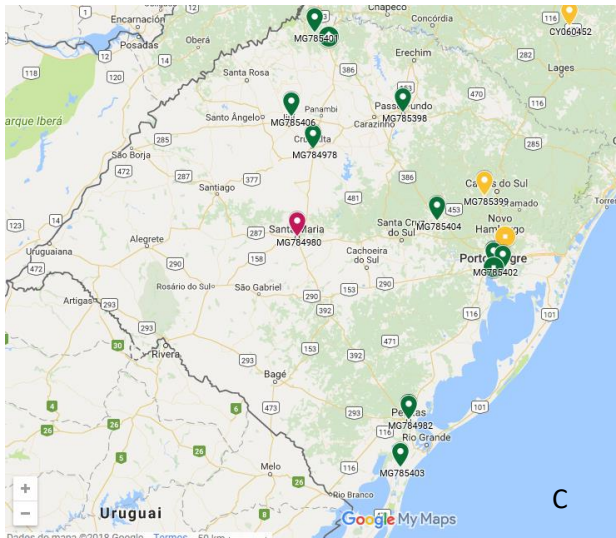

78

79 Figure 6: Map of HA most similar sequences obtained from Influenza Research  
80 Database to Rio Grande do Sul State (RS). Distribution of HA most similar sequences  
81 around the world (A), most similar sequences of Brazil (B) and distribution of samples  
82 in RS (C).

83

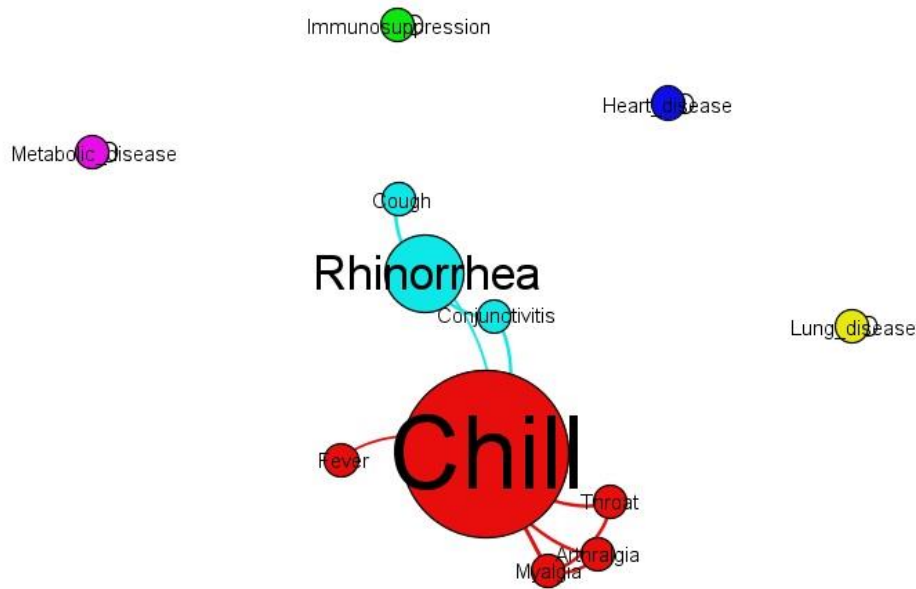

84

85 Figure 7: Relationship between symptoms showing chill (biggest red circle) as the most  
86 frequent and rhinorrhea (biggest blue circle) as second most frequent and related  
87 symptom. Metabolic disease, immunosuppression, heart disease and lung disease didn't  
88 show any relation during A(H1N1)pdm09 in Rio Grande do Sul.
